# Supplementary material
Source: PubMed Central journal article supplement (PMC6059356)
Supplement: NIHMS929692-supplement-suppl.pdf [file NIHMS929692-supplement-suppl.pdf]

Appendix 1. Medication classification

| <b>Medication Class</b>       | <b>Generic (chemical) form</b>                                                                                                                                        | <b>Brand name medications</b>                                                                                                                                                                                                                                             |
|-------------------------------|-----------------------------------------------------------------------------------------------------------------------------------------------------------------------|---------------------------------------------------------------------------------------------------------------------------------------------------------------------------------------------------------------------------------------------------------------------------|
| Inhaled Corticosteroid        | Beclomethasone dipropionate<br>Budesonide<br>Flunisolide<br>Fluticasone<br>Mometasone furoate<br>Triamcinolone acetonide<br>Prednisolone<br>Prednisone<br>Ciclesonide | Beclovent, QVAR, Vanceril<br>Pulmicort Turbuhaler (Pulmicort Flexhaler–2012), Symbicort <sup>a</sup><br>Aerobid<br>Advair <sup>b</sup> , Flovent, Flovent Rotadisk<br>Asmanex (twisthaler), Dulera <sup>c</sup><br>Azmacort<br>Pediapred, Prelone<br>Deltasone<br>Alvesco |
| Oral Corticosteroid           | Methylprednisolone<br>Prednisolone<br>Prednisone                                                                                                                      | Medrol<br>Pediapred, Prelone<br>Deltasone                                                                                                                                                                                                                                 |
| Anti-inflammatory             | Cromolyn<br>Nedocromil                                                                                                                                                | Intal<br>Tilade                                                                                                                                                                                                                                                           |
| Long-acting $\beta$ -agonist  | Formoterol<br>Salmeterol                                                                                                                                              | Dulera <sup>c</sup> , Foradil, Perforomist, Symbicort <sup>a</sup><br>Advair <sup>b</sup> , Serevent                                                                                                                                                                      |
| Leukotriene pathway inhibitor | Montelukast<br><br>Zafirlukast<br>Zileuton                                                                                                                            | Singulair<br><br>Accolate<br>Zyflo Filmtab                                                                                                                                                                                                                                |
| Methylxanthine                | Oxtriphylline<br>Theophylline                                                                                                                                         | Choldeyl<br>Aerolate, Elixophyllin, Respbid, Slo-phyllin, Slo-bid, Theo-24, Theochron, Theoclear, Theodur, Theo-Dur, Theospan, T-Phyl, Uniphyll                                                                                                                           |
| Anti-cholinergic              | Ipratropium bromide                                                                                                                                                   | Atrovent, Combivent <sup>d</sup> , Duoneb <sup>e</sup>                                                                                                                                                                                                                    |
| Short-acting $\beta$ -agonist | Albuterol (A. sulfate or salbutamol)<br>Bitolterol<br>Levalbuterol tartrate<br>Metaproterenol<br>Pirbuterol<br>Terbutaline (T. sulfate)                               | Combivent <sup>d</sup> , Duoneb <sup>e</sup> , Pro-Air HFA, Proventil, Ventolin, Volmax<br><br>Tornalate<br>Xopenex HFA, Xopenex<br>Alupent, Metaprel<br>Maxair<br>Brethaire, Brethine                                                                                    |

<sup>a</sup> Symbicort is a combination treatment consisting of a corticosteroid (Budesonide) and long-acting  $\beta$ -agonist (Formoterol).

<sup>b</sup> Advair is a combination treatment consisting of a corticosteroid (Fluticasone) and long-acting  $\beta$ -agonist (Salmeterol).

- <sup>c</sup> Dulera is a combination treatment consisting of a corticosteroid (Mometasone furoate) and long-acting  $\beta$ -agonist (Formoterol).
- <sup>d</sup> Combivent is a combination treatment consisting of a short-acting  $\beta$ -agonist (Albuterol) and anti-cholinergic (Ipratropium bromide).
- <sup>e</sup> Duoneb is a combination treatment consisting of a short-acting  $\beta$ -agonist (Albuterol) and anti-cholinergic (Ipratropium bromide).
